# Supplementary material
Source: PubMed Central journal article supplement (PMC6692574)
Supplement: BPH-176-3264-s001.pdf [file BPH-176-3264-s001.pdf]

## Supplementary information

**Supplementary Table S1** The primers sequences of miRNAs in the present work.

---

| MiRNAs/miRBase                | Primer sequence (5'-3')                               |
|-------------------------------|-------------------------------------------------------|
| Accession number              |                                                       |
| rno-miR-29b-3p-F/MIMAT0000801 | TAGCACCATTTGAAATCAGTGTT                               |
| mmu-miR-29b-3p-F/MIMAT0000127 | TAGCACCATTTGAAATCAGTGTT                               |
| U6-F                          | FR: GCTTCGGCAGCACATATACTA<br>RP: AAATATGGAACGCTTCACGA |
| miRNAs-RT                     | Oligo (dT)                                            |

---

F: forward primer; R: reverse primer

**Supplementary Table S2** The primer sequences used for real-time PCR assay in the present work.

| Name/NCBI Gene ID        | Forward primer (5'→3')    | Reverse primer (5'→3')    |
|--------------------------|---------------------------|---------------------------|
| <i>Rattus norvegicus</i> |                           |                           |
| TRAF3/362788             | GTGGTGTCTGCTGCCCTCATAAG   | GGCCTTGATCTGCTGGTTTG      |
| IL-1 $\beta$ /24494      | CCCTGAACTCAACTGTGAAATAGCA | CCCAAGTCAAGGGCTTGGAA      |
| IL-6/24498               | ATTGTATGAACAGCGATGATGCAC  | CCAGGTAGAAACGGAACTCCAGA   |
| TNF- $\alpha$ /24835     | TCAGTTCATGGCCAGAC         | GTTGTCTTTGAGATCCATGCCATT  |
| $\beta$ -actin/81822     | CCTGTGGCATCCATGAAACTAC    | CCAGGGCAGTAATCTCCTTCTG    |
| <i>Mus musculus</i>      |                           |                           |
| TRAF3/22031              | GAGCAAGGAGGCTACAAGGAG     | CATGCAGCTCTCGCAGAAC       |
| IL-1 $\beta$ /16176      | TCCAGGATGAGGACATGAGCAC    | GAACGTCACACACCAGCAGGTTA   |
| IL-6/16193               | CCACTTCACAAGTCGGAGGCTTA   | CCAGTTTGGTAGCATCCATCATTTC |
| TNF- $\alpha$ /21926     | TATGGCCCAGACCCTCACA       | GGAGTAGACAAGGTACAACCCATC  |
| $\beta$ -actin/11461     | ACTGCCGCATCCTCTTCT        | TCAACGTCACACTTCATGATGGA   |

**Supplementary Table S3** The information of the antibodies used in the present work.

| Primary antibody/<br>Article number | Source | Dilution | Company                                          |
|-------------------------------------|--------|----------|--------------------------------------------------|
| TRAF3/bs-1185R                      | Rabbit | 1: 1000  | Bioss, BingJing, China                           |
| TAK1/12330-2-AP                     | Rabbit | 1: 1000  | Proteintech Group, Chicago, USA                  |
| p-TAK1(Ser412)/#9339S               | Rabbit | 1: 1000  | Cell Signaling Technology,<br>Massachusetts, USA |
| P65/10745-1-AP                      | Rabbit | 1: 1000  | Proteintech Group, Chicago, USA                  |
| BAX/50599-2-Ig                      | Rabbit | 1: 1000  | Proteintech Group, Chicago, USA                  |
| Bcl-2/12789-1-AP                    | Rabbit | 1: 1000  | Proteintech Group, Chicago, USA                  |
| $\beta$ -actin/20536-1-AP           | Rabbit | 1: 1000  | Proteintech Group, Chicago, USA                  |
